# Supplementary material for: Supramolecular and electrocatalytic OER properties of new heteroleptic fluoro- and trifluoromethyl-substituted Ni(ii)-dithiolates: effects of substituents and dihedral angle on the electrocatalytic performance
Source: Royal Society of Chemistry journal article supplement (doi:10.1039/d4nj03502j), 2024-01-01
Supplement: d4nj03502j1.pdf [file d4nj03502j1.pdf]

## Electronic Supporting Information

### Supramolecular and Electrocatalytic OER properties of new heteroleptic fluoro- and trifluoromethyl- substituted Ni(II)-dithiolates: Effect of substituents and dihedral angle on electrocatalytic performance

Aparna Kushwaha,<sup>a</sup> Devyani Srivastava,<sup>a</sup> Gabriele Kociok-Köhn,<sup>b</sup> Suresh W. Gosawi,<sup>c</sup> Ratna Chauhan,<sup>d</sup> Sarfaraz Ahmed,<sup>c</sup> Abhinav Kumar,<sup>a\*</sup>

<sup>a</sup>Department of Chemistry, Faculty of Science, University of Lucknow, Lucknow 226 007, India.  
Email: abhinavmarshal@gmail.com

<sup>b</sup>Physical Structures Characterisation, University of Bath, Claverton Down, Bath, BA2 7AY, UK.

<sup>c</sup>Department of Physics, Savitribai Phule Pune University, Pune-411007, India.

<sup>d</sup>Department of Environmental Science, Savitribai Phule Pune University, Pune-411007, India.

<sup>e</sup>Department of Pharmacognosy, College of Pharmacy, King Saud University, P.O. Box 2457 Riyadh 11451, Saudi Arabia

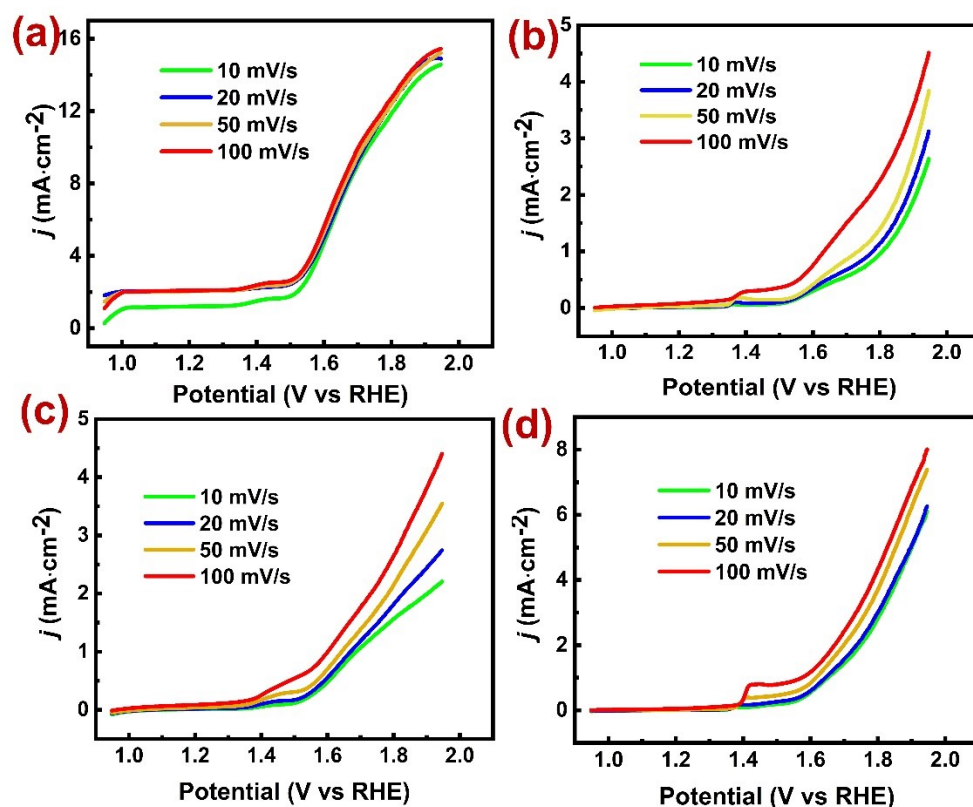

**Fig. S1** Linear Sweep Voltammograms of (a)-(d) of Ni-1, Ni-2, Ni-3 and Ni-4, respectively at 10, 20, 50 and 100  $\text{mV/s}$  scan rates.

## Electronic Supporting Information

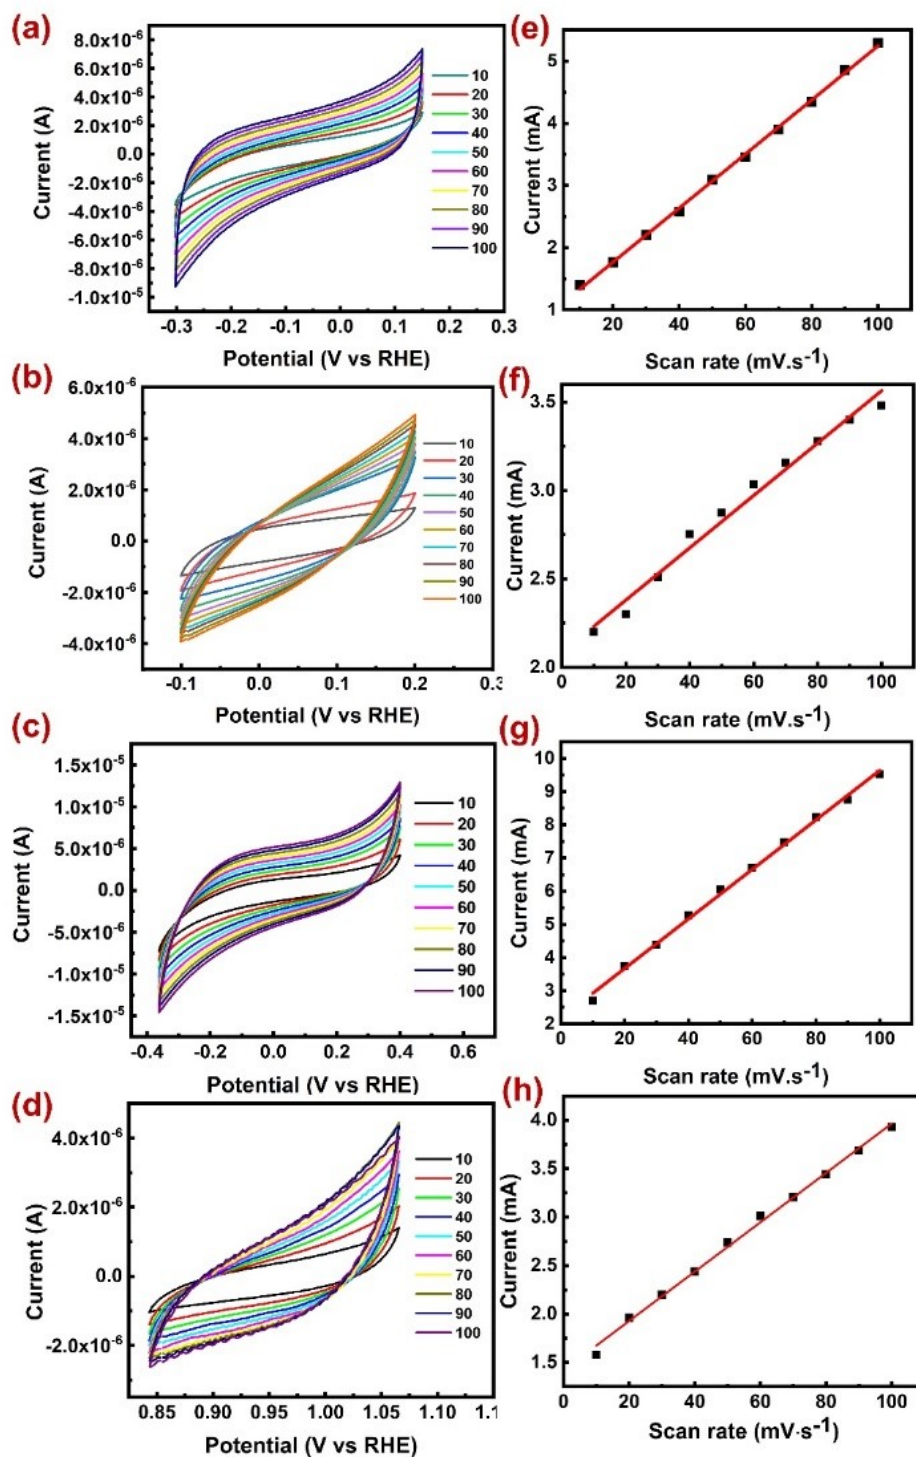

**Fig S2.** Cyclic voltammogram for (a) Ni-1, (b) Ni-2, (c) Ni-3 and (d) Ni-4 in 0.1 M KOH at different scan rates; plots constructed between current density and scan rates (e) Ni-1, (f) Ni-2, (g) Ni-3 and (h) Ni-4.

## Electronic Supporting Information

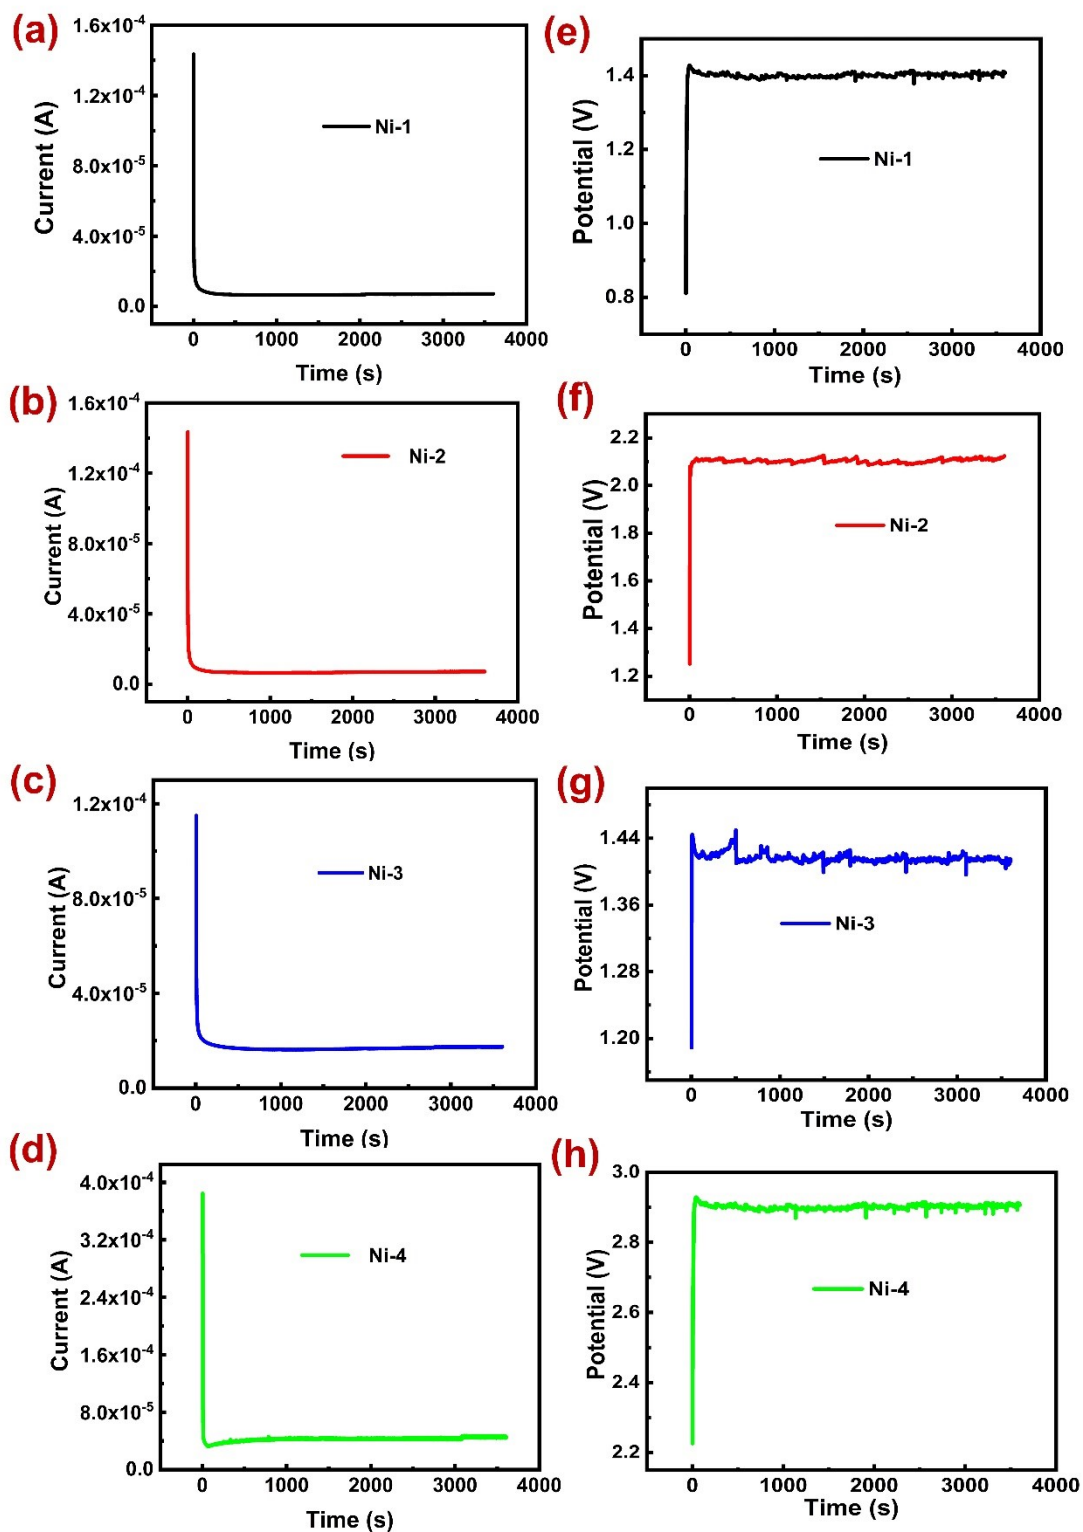

**Fig. S3** Chronoamperometry plots (a)-(d) of Ni-1, Ni-2, Ni-3 and Ni-4, respectively; Chronopotentiometry plots (e)-(h) of Ni-1, Ni-2, Ni-3 and Ni-4, respectively.

## Electronic Supporting Information

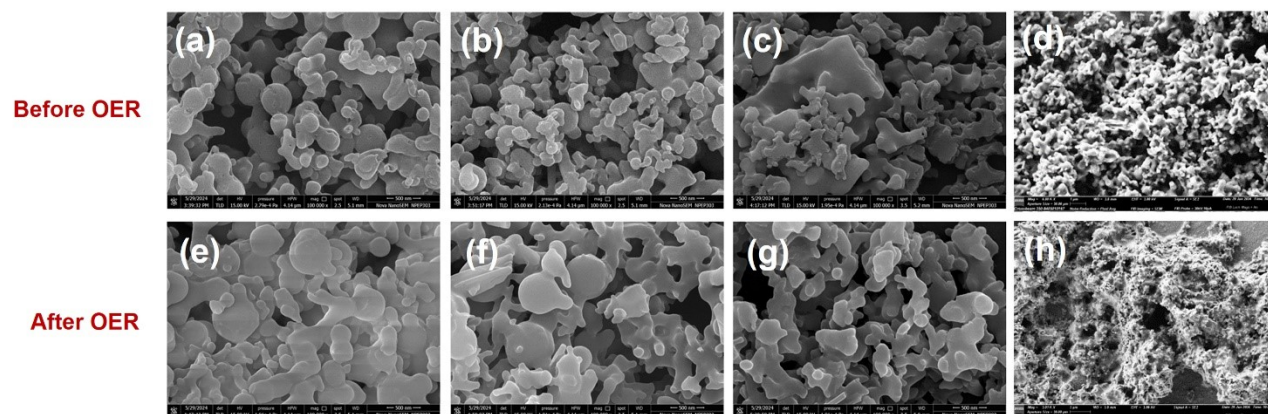

**Fig. S4** FESEM images for (a) and (e) Ni-1; (b) and (f) Ni-2; (c) and (g) Ni-3; (d) and (h) Ni-4 before and after OER electrocatalysis.
